# Supplementary material
Source: Springer Nature journal article supplement (https://www.springermedizin.de/resource/supplementary/13229_2010_11_MOESM2_ESM.pdf/9675964)

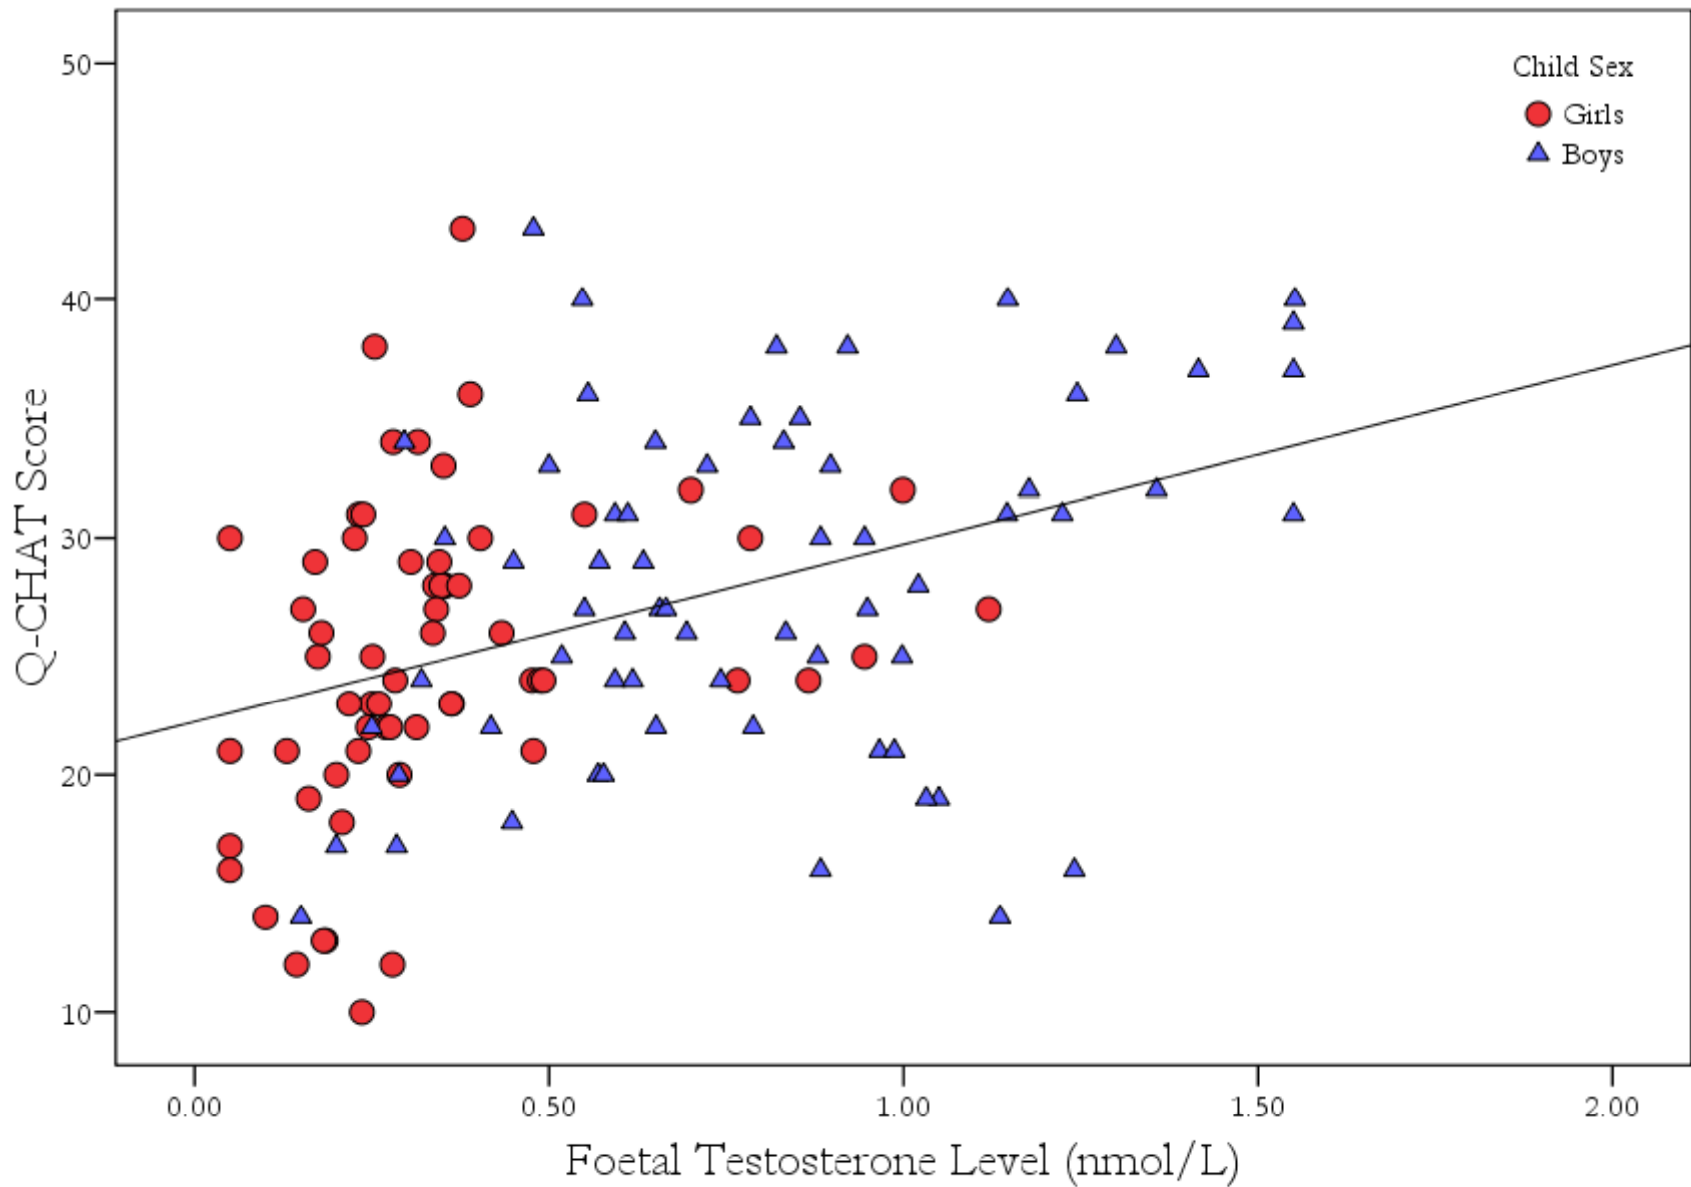

Supplement: MOESM2 [file 9675964]
